# Supplementary material for: Using Real-World Data to Determine Health System Costs of Ontario Women Screened for Breast Cancer
Source: MDPI journal article supplement (doi:10.3390/curroncol29110657), 2022-10-31
Supplement: s1 [file s1]

## SUPPLEMENTARY MATERIAL

|                                                                  |   |
|------------------------------------------------------------------|---|
| Table S1: Exclusion codes.....                                   | 2 |
| Table S2: Ontario specific diagnostic codes and unit costs ..... | 2 |
| Figure S1: Breast cancer screening schematic .....               | 3 |
| Table S3: Ontario specific cost assumptions.....                 | 4 |
| Table S4: Quebec specific unit costs .....                       | 4 |

**Table S1.** Exclusion codes.

| OHIP FEE CODE | DESCRIPTION                                                       |
|---------------|-------------------------------------------------------------------|
| R112          | Augmentation mammoplasty – Unilateral Implant                     |
| Z142          | Removal of Breast Prosthesis                                      |
| E505          | Breast- with limited axillary node sampling                       |
| E506          | With Axillary sentinel node biopsy- add to R111                   |
| E546          | With axillary node dissection up to axillary vein- add to R111    |
| R108          | Simple Mastectomy                                                 |
| R109          | Mastectomy –modified or radical modified (with or without biopsy) |
| R117          | Subcutaneous with nipple preservation                             |

**Table S2.** Ontario specific diagnostic codes and unit costs.

| CODE              | DESCRIPTION                                                                                                                                                                                 | H (tech)         | P (prof) |
|-------------------|---------------------------------------------------------------------------------------------------------------------------------------------------------------------------------------------|------------------|----------|
| X172              | Mammogram (screening) – unilateral                                                                                                                                                          | \$28.05          | \$16.90  |
| X178              | Mammogram (screening) – bilateral                                                                                                                                                           | \$37.15          | \$27.00  |
| X194 <sup>a</sup> | Additional coned views with or without magnification (limit of two per breast) per film                                                                                                     | \$5.95           | \$5.20   |
| X166 <sup>b</sup> | Examination using portable machine (\$72.20 fee from Schedule of Facility Fees)                                                                                                             | n/a              | n/a      |
| X184              | Mammogram (diagnostic) – unilateral                                                                                                                                                         | \$28.05          | \$16.90  |
| X185              | Mammogram (diagnostic) – bilateral                                                                                                                                                          | \$37.15          | \$27.00  |
| X194              | Additional coned views with or without magnification (limit of two per breast) per film                                                                                                     | \$5.95           | \$5.20   |
| X166              | Examination using portable machine (\$72.20 fee from Schedule of Facility Fees)                                                                                                             | n/a              | n/a      |
| J127              | Vascular ultrasound breast – scan B-mode per breast                                                                                                                                         | \$23.70          | \$13.10  |
| J037              | Lymphangiogram – Mammary ductography                                                                                                                                                        | n/a              | \$70.35  |
| E475              | Portable ultrasound - only eligible for payment when personally rendered by a specialist in diagnostic radiology (33) in an area of a hospital outside of the diagnostic imaging department | n/a              | \$25.00  |
| X446              | MRI breast (unilateral/bilateral) – multi-slice sequence                                                                                                                                    | n/a              | \$73.35  |
| X447              | MRI breast (unilateral/bilateral) – repeat (another plane, different pulse sequence - to a maximum of 3 repeats).                                                                           | n/a              | \$36.70  |
| X192              | CT – Mammary ductography                                                                                                                                                                    | \$25.05          | \$10.65  |
| X121              | Stereotactic core breast biopsy                                                                                                                                                             | n/a              | \$83.15  |
| X201 <sup>c</sup> | Breast biopsy specimen x-ray, per specimen                                                                                                                                                  | \$5.95           | \$5.20   |
| X480              | MRI guidance of biopsy or lesion ablation, breast, unilateral                                                                                                                               | n/a              | \$285.00 |
| L864              | SURGICAL PATHOLOGY, LEVEL 4. Gross and microscopic examination of breast (biopsy, not requiring microscopic evaluation of surgical margin; reduction mammoplasty)                           | n/a              | \$48.65  |
| L865              | SURGICAL PATHOLOGY, LEVEL 5. Gross and microscopic examination of breast (partial or simple mastectomy; excision requiring microscopic evaluation of surgical margin)                       | n/a              | \$103.20 |
| L866              | SURGICAL PATHOLOGY, LEVEL 6. Gross and microscopic examination of breast (mastectomy with regional lymph nodes)                                                                             | n/a              | \$181.65 |
| L805              | Aspiration biopsy e.g., lung, breast, thyroid, prostate                                                                                                                                     | n/a              | \$81.20  |
| Z141              | Needle biopsy (breast) – one or more                                                                                                                                                        | n/a              | \$37.20  |
| Z143              | Needle biopsy - large core breast biopsy - (14 gauge or larger bore needle)                                                                                                                 | n/a              | \$132.75 |
| R107              | Tumour or tissue for diagnostic biopsy and/or treatment, e.g., carcinoma, fibroadenoma or fibrocystic disease (single or multiple - same breast)                                            | Asst*6<br>Anae*6 | \$169.95 |
| J149              | Ultrasonic guidance of biopsy, aspiration, amniocentesis or drainage procedures (1 physician only)                                                                                          | \$47.30          | \$36.85  |

|      |                                                                                                                                                                                                                   |     |          |
|------|-------------------------------------------------------------------------------------------------------------------------------------------------------------------------------------------------------------------|-----|----------|
| E525 | Tumour or tissue for diagnostic biopsy and/or treatment, e.g., carcinoma, fibroadenoma or fibrocystic disease (single or multiple - same breast) – after localization with mammographic wire or radioactive seeds | n/a | \$48.05  |
| X169 | DIAGNOSTIC RADIOLOGY-LAMINOGRAM,PLANIGRAM,TOMOGRAM (default use Ontario cost)                                                                                                                                     | n/a | \$51.25  |
| A225 | Consultation                                                                                                                                                                                                      | n/a | \$167.35 |
| A220 | Genetics - Special genetic consultation                                                                                                                                                                           | n/a | \$300.70 |
| A223 | Genetics - Extended special genetic consultation                                                                                                                                                                  | n/a | \$401.30 |
| A325 | Limited consultation                                                                                                                                                                                              | n/a | \$105.25 |
| A226 | Repeat consultation                                                                                                                                                                                               | n/a | \$105.25 |
| A221 | Genetic minor assessment                                                                                                                                                                                          | n/a | \$38.05  |
| K016 | Genetic assessment, patient or family, direct contact, per                                                                                                                                                        | n/a | \$74.05  |
| K222 | Genetic care per ½ hr                                                                                                                                                                                             | n/a | \$75.75  |
| K223 | Clinical interpretation                                                                                                                                                                                           | n/a | \$38.20  |
| K229 | Complex genetic test interpretation                                                                                                                                                                               | n/a | \$65.85  |
| K044 | Genetic counselling on behalf of a third party                                                                                                                                                                    | n/a | \$62.75  |

<sup>a</sup>If X194 is billed on the same day as a screening mammogram code (i.e., X172 or X178) then cost added to screening mammogram costs. If X194 is billed without a screening mammogram code then cost added to diagnostic mammogram costs.

<sup>b</sup>If X166 is billed on the same day as a screening mammogram code (i.e., X172 or X178) then cost added to screening mammogram costs. If X166 is billed without a screening mammogram code then cost added to diagnostic mammogram costs.

<sup>c</sup>If X201 is billed only and there are no other biopsy codes billed during follow-up (i.e., E525, J149, L805, L864-L866, R107, X121, X480, Z141, or Z143) then exclude X201 from diagnostic biopsy costs.

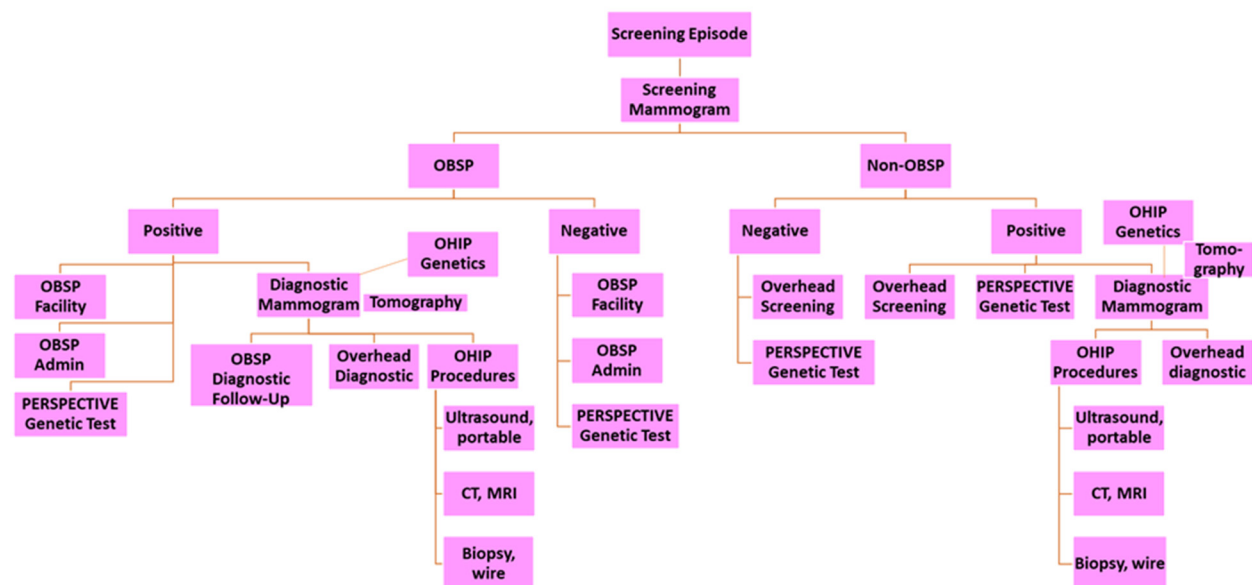

Figure S1. Breast cancer screening schematic.

**Table S3.** Ontario specific cost assumptions.

| OBSP                                                                                                       | COST                              |
|------------------------------------------------------------------------------------------------------------|-----------------------------------|
| OBSP facility cost (IHF=\$15.97, hospital=\$21.57) based on database flag for screening mammogram location | IHF= \$15.97<br>Hospital= \$21.57 |
| OBSP administrative cost (M. Pistilli, personal communication, January 10, 2022)                           | \$17.52                           |
| OBSP diagnostic follow-up cost for those women who had any OHIP diagnostic procedures                      | \$100.00                          |
| NON-OBSP                                                                                                   |                                   |
| Non-OBSP institution/overhead cost                                                                         | \$51.22                           |

**Table S4.** Quebec specific unit costs.

| CODE  | DESCRIPTION                                                                                                                                                                                                  | QC Tech<br>Cost 2021 | QC Prof<br>Cost 2021 |
|-------|--------------------------------------------------------------------------------------------------------------------------------------------------------------------------------------------------------------|----------------------|----------------------|
| 08103 | Mammogram (screening) – unilateral                                                                                                                                                                           | \$24.70              | \$9.20               |
| 08079 | Mammogram (screening) – bilateral                                                                                                                                                                            | \$40.55              | \$18.45              |
| X194  | Additional coned views with or without magnification (limit of two per breast) per film USE ONTARIO COSTS                                                                                                    | \$5.95               | \$5.20               |
| 08146 | Examination using portable machine (mobile unit)                                                                                                                                                             | Assume \$0           | \$18.35              |
| 08048 | Mammogram (diagnostic) – unilateral                                                                                                                                                                          | \$26.80              | \$10.05              |
| 08049 | Mammogram (diagnostic) – bilateral                                                                                                                                                                           | \$40.55              | \$19.85              |
| X194  | Additional coned views with or without magnification (limit of two per breast) per film USE ONTARIO COSTS                                                                                                    | \$5.95               | \$5.20               |
| 08146 | Examination using portable machine                                                                                                                                                                           | Assume \$0           | \$18.35              |
| J127  | Vascular ultrasound breast – scan B-mode per breast USE ONTARIO COSTS                                                                                                                                        | \$23.70              | \$13.10              |
| 60705 | Lymphangiogram – Mammary ductography USE QC BILATERIAL SURFACE ULTRASOUND                                                                                                                                    | \$67.95              | \$70.20              |
| E475  | Portable ultrasound - only eligible for payment when personally rendered by a specialist in diagnostic radiology (33) in an area of a hospital outside of the diagnostic imaging department USE ONTARIO COST | \$25.00              | Assume \$0           |
| 08590 | MRI breast (unilateral/bilateral) – multi-slice sequence                                                                                                                                                     | Assume \$0           | \$151.70             |
| X447  | MRI breast (unilateral/bilateral) – repeat USE ONTARIO COST                                                                                                                                                  | Assume \$0           | \$36.70              |
| X192  | CT – Mammary ductography USE ONTARIO COST                                                                                                                                                                    | Assume \$0           | \$35.70              |
| 20068 | Stereotactic core breast biopsy (BREAST BIOPSY WITH SUCTION-ASSISTED MACROBIOPSY DEVICE)                                                                                                                     | Assume \$0           | \$166.25             |
| X201  | Breast biopsy specimen x-ray, per specimen DEFAULT USED ONTARIO COST                                                                                                                                         | \$5.95               | \$5.20               |
| 00852 | MRI guidance of biopsy or lesion ablation breast (UNILATERAL HARPOON UNDER U/S OR STEREOTACTIC GUIDANCE)                                                                                                     | Assume \$0           | \$121.70             |
| L864  | SURGICAL PATHOLOGY, LEVEL 4. Gross and microscopic examination of breast (biopsy, not requiring microscopic evaluation of surgical margin; reduction mammoplasty) DEFAULT USED ONTARIO COST                  | Assume \$0           | \$48.65              |
| L865  | SURGICAL PATHOLOGY, LEVEL 5. Gross and microscopic examination of breast (partial or simple mastectomy; excision requiring microscopic evaluation of surgical margin) DEFAULT USED ONTARIO COST              | Assume \$0           | \$103.20             |
| L866  | SURGICAL PATHOLOGY, LEVEL 6. Gross and microscopic examination of breast (mastectomy with regional lymph nodes) DEFAULT USED ONTARIO COST                                                                    | Assume \$0           | \$181.65             |
| 00847 | Aspiration biopsy e.g. lung, breast, thyroid, prostate (BREAST CYST PUNCTURE W/ASPIRATION)                                                                                                                   | Assume \$0           | \$18.70              |
| Z141  | Needle biopsy (breast) – one or more USE ONTARIO COST                                                                                                                                                        | Assume \$0           | \$37.20              |
| 00849 | Needle biopsy - large core breast biopsy - (14 gauge or larger bore needle)                                                                                                                                  | Assume \$0           | \$128.45             |

|       |                                                                                                                                                                                                                                                 |            |          |
|-------|-------------------------------------------------------------------------------------------------------------------------------------------------------------------------------------------------------------------------------------------------|------------|----------|
| 01201 | Tumour or tissue for diagnostic biopsy and/or treatment, e.g. carcinoma, fibroadenoma or fibrocystic disease (single or multiple - same breast) (BIOPSY FOR SINGLE/MULTIPLE BENIGN/MALIGNANT LESION OF BREAST)                                  | Assume \$0 | \$212.90 |
| J149  | Ultrasonic guidance of biopsy, aspiration, amniocentesis or drainage procedures (1 physician only) USE ONTARIO COST                                                                                                                             | \$47.30    | \$36.85  |
| 20029 | Tumour or tissue for diagnostic biopsy and/or treatment, e.g. carcinoma, fibroadenoma or fibrocystic disease (single or multiple - same breast) – after localization with mammographic wire or radioactive seeds (INSTALLATION OF MARKER GUIDE) | Assume \$0 | \$29.15  |
| n/a   | OBSP facility cost - Code 08081                                                                                                                                                                                                                 | \$7.50     | n/a      |
| n/a   | OBSP administrative cost                                                                                                                                                                                                                        | \$17.52    | n/a      |
| n/a   | OBSP diagnostic follow-up cost - Code 08144                                                                                                                                                                                                     | \$59.80    | n/a      |
| n/a   | Overhead cost                                                                                                                                                                                                                                   | \$51.22    | n/a      |
| X169  | DIAGNOSTIC RADIOLOGY-LAMINOGRAM,PLANIGRAM,TOMOGRAM (default use Ontario cost)                                                                                                                                                                   | n/a        | \$51.25  |
| Z141  | Needle biopsy (breast) – one or more (DEFAULT USE ONTARIO COST)                                                                                                                                                                                 | n/a        | \$37.20  |
| A221  | Genetic minor assessment (DEFAULT USE ONTARIO COST)                                                                                                                                                                                             | n/a        | \$38.05  |
| K016  | Genetic assessment, patient or family, direct contact, per (USED QC CODE 9164 CONTROL VISIT)                                                                                                                                                    | n/a        | \$67.60  |
| K229  | Complex genetic test interpretation (USED QC CODE 9164 CONTROL VISIT)                                                                                                                                                                           | n/a        | \$67.60  |
| K044  | Genetic counselling on behalf of a third party (USED QC CODE 9164 CONTROL VISIT)                                                                                                                                                                | n/a        | \$67.60  |
